# Supplementary material for: Using the 11-item Version of the RCADS to Identify Anxiety and Depressive Disorders in Adolescents
Source: Springer Nature journal article supplement (doi:10.1007/s10802-021-00817-w), 2021-04-01
Supplement: MOESM1 [file 19031724]

**Using the 11-item Version of the RCADS to Identify Anxiety and Depressive Disorders in  
Adolescents**

*Journal of Abnormal Child Psychology*

Electronic Supplementary Material 1: Rank-ordered item-total correlations and item-discrimination indices for the RCADS-P items

| Item number            | Item (RCADS Subscale)                                                                                            | Item-anxiety/depression diagnosis correlation |       |                       |                    |
|------------------------|------------------------------------------------------------------------------------------------------------------|-----------------------------------------------|-------|-----------------------|--------------------|
|                        |                                                                                                                  | Item-total                                    | Total | Controlled for Gender | Controlled for age |
| Anxiety Items          |                                                                                                                  |                                               |       |                       |                    |
| RCADS-P35              | My child worries about what is going to happen (GAD)                                                             | .81*                                          | .44*  | .42*                  | .45*               |
| RCADS-P1               | My child worries about things (GAD)                                                                              | .79*                                          | .43*  | .40*                  | .43*               |
| RCADS-P22              | My child worries that bad things will happen to him/her (GAD)                                                    | .76*                                          | .43*  | .41*                  | .45*               |
| RCADS-P30              | My child worries about making mistakes (SOC)                                                                     | .76*                                          | .43*  | .40*                  | .42*               |
| RCADS-P27              | My child worries that something bad will happen to him/her (GAD)                                                 | .76*                                          | .40*  | .38*                  | .42*               |
| RCADS-P45              | My child worries when in bed at night (SEP)                                                                      | .74*                                          | .49*  | .47*                  | .50*               |
| RCADS-P32              | My child worries what other people think of him/her (SOC)                                                        | .74*                                          | .48*  | .45*                  | .48*               |
| RCADS-P43              | My child feels afraid that he/she will make a fool of him/herself in front of people (SOC)                       | .74*                                          | .49*  | .46*                  | .48*               |
| RCADS-P41              | My child worries that he/she will suddenly get a scared feeling when there is nothing to be afraid of (PD)       | .73*                                          | .42*  | .40*                  | .42*               |
| RCADS-P20              | My child worries about looking foolish (SOC)                                                                     | .73*                                          | .53*  | .50*                  | .53*               |
| RCADS-P34 <sup>a</sup> | All of a sudden my child will feel really scared for no reason at all (PD)                                       | .71*                                          | .40*  | .37*                  | .41*               |
| RCADS-P4               | My child worries when he/she thinks he/she has done poorly at something (SOC)                                    | .70*                                          | .35*  | .32*                  | .34*               |
| RCADS-P24              | When my child has a problem, his/her heart beats really fast (PD)                                                | .70*                                          | .42*  | .40*                  | .41*               |
| RCADS-P7               | My child feels scared when taking a test (SOC)                                                                   | .70*                                          | .36*  | .33*                  | .36*               |
| RCADS-P12              | My child worries about doing badly at school work (SOC)                                                          | .69*                                          | .41*  | .38*                  | .40*               |
| RCADS-P18              | My child has trouble going to school in the mornings because of feeling nervous or afraid (SEP)                  | .69*                                          | .45*  | .44*                  | .47*               |
| RCADS-P28              | When my child has a problem, he/she feels shaky (PD)                                                             | .67*                                          | .39*  | .37*                  | .39*               |
| RCADS-P8               | My child worries when he/she thinks someone is angry with him/her (SOC)                                          | .67*                                          | .33*  | .31*                  | .34*               |
| RCADS-P33              | My child is afraid of being in crowded places (like shopping centres, the cinema, buses, busy playgrounds) (SEP) | .66*                                          | .41*  | .39*                  | .42*               |
| RCADS-P13              | My child worries that something awful will happen to someone in the family (GAD)                                 | .65*                                          | .27*  | .25*                  | .28*               |

|                        |                                                                                          |      |      |      |      |
|------------------------|------------------------------------------------------------------------------------------|------|------|------|------|
| RCADS-P3               | When my child has a problem, he/she gets a funny feeling in his/her stomach (PD)         | .63* | .41* | .38* | .41* |
| RCADS-P38              | My child feels afraid if he/she has to talk in front of the class (SOC)                  | .63* | .38* | .36* | .38* |
| RCADS-P14 <sup>a</sup> | My child suddenly feels as if he/she can't breathe when there is no reason for this (PD) | .61* | .31* | .28* | .30* |
| RCADS-P39 <sup>a</sup> | My child's heart suddenly starts to beat too quickly for no reason (PD)                  | .61* | .38* | .35* | .37* |
| RCADS-P46              | My child would feel scared if he/she had to stay away from home overnight (SEP)          | .56* | .31* | .29* | .33* |
| RCADS-P37              | My child thinks about death (GAD)                                                        | .55* | .28* | .26* | .29* |
| RCADS-P26 <sup>a</sup> | My child suddenly start to tremble or shake when there is no reason for this (PD)        | .54* | .29* | .27* | .28* |
| RCADS-P9               | My child worries about being away from me (SEP)                                          | .54* | .18* | .15* | .21* |
| RCADS-P5               | My child feels afraid of being alone at home (SEP)                                       | .51* | .23* | .20* | .24* |
| RCADS-P17 <sup>a</sup> | My child feels scared to sleep on his/her own (SEP)                                      | .47* | .22* | .20* | .26* |
| RCADS-P36 <sup>a</sup> | My child suddenly become dizzy or faint when there is no reason for this (PD)            | .43* | .22* | .19* | .21* |
| Depression Items       |                                                                                          |      |      |      |      |
| RCADS-P19              | My child has no energy for things (MDD)                                                  | .83* | .42* | .41* | .39* |
| RCADS-P29              | My child feels worthless (MDD)                                                           | .81* | .37* | .36* | .37* |
| RCADS-P21              | My child is tired a lot (MDD)                                                            | .80* | .42* | .41* | .38* |
| RCADS-P2               | My child feels sad or empty (MDD)                                                        | .78* | .40* | .39* | .39* |
| RCADS-P6               | Nothing is much fun for my child anymore (MDD)                                           | .76* | .39* | .38* | .37* |
| RCADS-P25              | My child cannot think clearly (MDD)                                                      | .74* | .28* | .27* | .28* |
| RCADS-P11              | My child has trouble sleeping (MDD)                                                      | .71* | .29* | .28* | .29* |
| RCADS-P40              | My child feels like he/she doesn't want to move (MDD)                                    | .69* | .30* | .28* | .28* |
| RCADS-P15              | My child has problems with his/her appetite (MDD)                                        | .68* | .29* | .27* | .27* |
| RCADS-P47              | My child feel restless (MDD)                                                             | .67* | .25* | .24* | .23* |

*Note.* GAD = generalised anxiety disorder, PD = panic disorder, SOC = social anxiety disorder, SEP = separation anxiety disorder, <sup>a</sup>Item > 80% of responses 'never' in a community sample, \* $p < .01$
