# Supplementary material for: Using the 11-item Version of the RCADS to Identify Anxiety and Depressive Disorders in Adolescents
Source: Springer Nature journal article supplement (doi:10.1007/s10802-021-00817-w), 2021-04-01
Supplement: MOESM2 [file 19031724]

**Using the 11-item Version of the RCADS to Identify Anxiety and Depressive Disorders in  
Adolescents**

*Journal of Abnormal Child Psychology*

Electronic Supplementary Material 2: ROC analyses for alternative combinations of adolescent-report anxiety items ( $\leq 12$  items) and depression items ( $\leq 9$  items) compared to original RCADS and RCADS-25.

| Scale              | Number of items | Total       |            |                | Boys       |                | Girls      |                | Older adolescents |                | Younger adolescents |                |
|--------------------|-----------------|-------------|------------|----------------|------------|----------------|------------|----------------|-------------------|----------------|---------------------|----------------|
|                    |                 | AUC (total) | Cut-off    | Sens/Spec      | Cut-off    | Sens/Spec      | Cut-off    | Sens/Spec      | Cut-off           | Sens/Spec      | Cut-off             | Sens/Spec      |
| RCADS-47- Anxiety  | 31              | .75         | 38.5       | .72/.69        | 26.5       | .77/.73        | 41.5       | .70/.67        | 38.5              | .77/.65        | 35.5                | .72/.66        |
| RCADS-25 - Anxiety | 15              | .71         | 13.5       | .73/.61        | 10.9       | .70/.62        | 15.5       | .68/.61        | 14.5              | .70/.65        | 13.5                | .72/.61        |
| Anx 1              | 12              | .79         | 15.5       | .73/.72        | 8.5        | .82/.72        | 17.5       | .72/.68        | 15.5              | .79/.71        | 14.5                | .73/.68        |
| Anx 2              | 11              | .79         | 13.5       | .76/.68        | 9.5        | .83/.74        | 15.5       | .74/.66        | 14.5              | .78/.71        | 13.5                | .72/.70        |
| Anx 3              | 10              | .80         | 12.5       | .75/.72        | 7.5        | .81/.72        | 13.5       | .74/.67        | 13.5              | .77/.75        | 11.5                | .76/.68        |
| Anx 4              | 9               | .80         | 11.5       | .74/.73        | 7.5        | .79/.74        | 12.5       | .74/.67        | 12.5              | .76/.75        | 10.5                | .74/.69        |
| Anx 5              | 8               | .80         | 10.5       | .77/.72        | 7.5        | .79/.77        | 11.5       | .75/.66        | 10.5              | .83/.70        | 9.5                 | .79/.69        |
| Anx 6              | 7               | .80         | 8.5        | .77/.72        | 5.5        | .81/.74        | 9.5        | .75/.67        | 8.5               | .82/.73        | 8.5                 | .72/.71        |
| <b>Anx 7</b>       | <b>6</b>        | <b>.81</b>  | <b>7.5</b> | <b>.77/.74</b> | <b>4.5</b> | <b>.83/.75</b> | <b>8.5</b> | <b>.73/.70</b> | <b>7.5</b>        | <b>.81/.78</b> | <b>7.5</b>          | <b>.74/.72</b> |
| Anx 8              | 5               | .81         | 5.5        | .76/.73        | 3.5        | .86/.75        | 6.5        | .76/.70        | 5.5               | .79/.75        | 5.5                 | .72/.71        |
| Anx 9              | 4               | .81         | 3.5        | .83/.66        | 2.5        | .88/.74        | 4.5        | .76/.68        | 3.5               | .86/.68        | 3.5                 | .81/.65        |
| Anx 10             | 3               | .81         | 2.5        | .88/.71        | 2.5        | .85/.78        | 3.5        | .77/.69        | 3.5               | .77/.74        | 2.5                 | .87/.62        |
| Anx 11             | 2               | .81         | 1.5        | .82/.70        | 0.5        | .91/.65        | 1.5        | .85/.57        | 1.5               | .80/.65        | 1.5                 | .83/.73        |

Note. Anx 1-11= alternative anxiety item sets, Sens/Spec = Sensitivity/Specificity.

| Scale                 | Number of items | Total       |            |                | Boys       |                | Girls      |                | Older adolescents |                | Younger adolescents |                |
|-----------------------|-----------------|-------------|------------|----------------|------------|----------------|------------|----------------|-------------------|----------------|---------------------|----------------|
|                       |                 | AUC (total) | Cut-off    | Sens/Spec      | Cut-off    | Sens/Spec      | Cut-off    | Sens/Spec      | Cut-off           | Sens/Spec      | Cut-off             | Sens/Spec      |
| RCADS-47 - Depression | 10              | .86         | 14.7       | .83/.71        | 13.5       | .88/.77        | 15.5       | .75/.71        | 15.5              | .73/.72        | 16.8                | .86/.83        |
| RCADS-25 - Depression | 10              | .86         | 14.7       | .83/.71        | 13.5       | .88/.77        | 15.5       | .75/.71        | 15.5              | .73/.72        | 16.8                | .86/.83        |
| Depr 1                | 9               | .86         | 13.5       | .79/.74        | 12.5       | .80/.80        | 13.5       | .68/.79        | 13.5              | .68/.77        | 14.5                | .79/.85        |
| Depr 2                | 8               | .87         | 12.5       | .78/.81        | 10.5       | .78/.94        | 12.5       | .73/.81        | 12.5              | .75/.79        | 12.5                | .79/.85        |
| Depr 3                | 7               | .87         | 10.5       | .74/.81        | 9.5        | .80/.88        | 10.5       | .69/.82        | 10.5              | .69/.79        | 10.5                | .77/.86        |
| Depr 4                | 6               | .86         | 9.5        | .76/.82        | 8.5        | .80/.88        | 9.5        | .71/.82        | 9.5               | .71/.79        | 9.5                 | .78/.90        |
| <b>Depr 5</b>         | <b>5</b>        | <b>.87</b>  | <b>8.5</b> | <b>.77/.89</b> | <b>7.5</b> | <b>.83/.88</b> | <b>8.5</b> | <b>.71/.89</b> | <b>8.5</b>        | <b>.70/.86</b> | <b>8.5</b>          | <b>.80/.90</b> |
| Depr 6                | 4               | .86         | 5.5        | .70/.77        | 5.5        | .82/.88        | 5.5        | .63/.76        | 5.5               | .64/.72        | 6.5                 | .82/.90        |
| Depr 7                | 3               | .86         | 4.5        | .77/.83        | 3.5        | .78/.88        | 4.5        | .73/.80        | 4.5               | .71/.80        | 4.5                 | .81/.90        |
| Depr 8                | 2               | .84         | 2.5        | .70/.70        | 2.5        | .77/.77        | 2.5        | .66/.66        | 2.5               | .62/.62        | 2.5                 | .74/.74        |

Note. Depr 1- Depr 8 = Alternative depression item sets, Sens/Spec = Sensitivity/Specificity.
