# Supplementary material for: Using the 11-item Version of the RCADS to Identify Anxiety and Depressive Disorders in Adolescents
Source: Springer Nature journal article supplement (doi:10.1007/s10802-021-00817-w), 2021-04-01
Supplement: MOESM3 [file 19031724]

**Using the 11-item Version of the RCADS to Identify Anxiety and Depressive Disorders in  
Adolescents**

*Journal of Abnormal Child Psychology*

Electronic Supplementary Material 3: Examining the functioning of items assessing risk of suicide/self-harm and symptom impact and duration.

## Adolescent-report

### a) Rank-ordered item-discrimination indices for the suicidal ideation items

| Item name | Item                                                | Item-depression diagnosis correlation |                       |                    |
|-----------|-----------------------------------------------------|---------------------------------------|-----------------------|--------------------|
|           |                                                     | Total                                 | Controlled for Gender | Controlled for age |
| MFQ19_T   | I thought about killing myself.                     | .39*                                  | .39*                  | .40*               |
| MFQ16_T   | I thought that life wasn't worth living.            | .36*                                  | .35*                  | .35*               |
| MFQ17_T   | I thought about death or dying.                     | .32*                                  | .32*                  | .33*               |
| MFQ18_T   | I thought my family would be better off without me. | .18*                                  | .17*                  | .21*               |

Note. MFQ-P16-19\_T = transformed MFQ items, \* $p < .01$ .

### b) ROC curve analyses for 5 RCADS depression items with different combinations of suicidal ideation items

|                                                   | Total       |             | Boys           |            | Girls          |             | Older adolescents |             | Younger adolescents |             |                |
|---------------------------------------------------|-------------|-------------|----------------|------------|----------------|-------------|-------------------|-------------|---------------------|-------------|----------------|
|                                                   | AUC (total) | Cut-off     | Sens/Spec      | Cut-off    | Sens/Spec      | Cut-off     | Sens/Spec         | Cut-off     | Sens/Spec           | Cut-off     | Sens/Spec      |
| 5 Depression items                                | .87         | 8.5         | .82/.77        | 7.5        | .88/.83        | 8.5         | .82/.71           | 8.5         | .79/.70             | 8.5         | .90/.80        |
| 5 Depression items + MFQ 19_T, MFQ 16_T, MFQ 17_T | .88         | 11.25       | .83/.76        | 10.3       | .92/.82        | 11.25       | .83/.72           | 11.75       | .80/.78             | 11.25       | .82/.78        |
| 5 Depression items + MFQ 19_T, MFQ 16_T           | .89         | 10.75       | .80/.79        | 10.25      | .92/.86        | 10.25       | .83/.73           | 10.75       | .80/.77             | 10.75       | .82/.81        |
| <b>5 Depression items + MFQ 19_T</b>              | <b>.89</b>  | <b>9.25</b> | <b>.83/.79</b> | <b>8.8</b> | <b>.92/.85</b> | <b>9.25</b> | <b>.83/.76</b>    | <b>9.25</b> | <b>.80/.78</b>      | <b>9.25</b> | <b>.91/.80</b> |

Note. Sens/Spec = Sensitivity/Specificity. MFQ-P16-19\_T = transformed MFQ-C items.

### c) Summary of binary logistic regression for 5 RCADS depression items with and without suicidal ideation item

| Model   |                              | $b$ (SE)    | Wald $z$ -value        | OR (95% CI)        | McFadden's $R^2$ | Model fit change ( $\chi^2$ ) |
|---------|------------------------------|-------------|------------------------|--------------------|------------------|-------------------------------|
| Model 1 | Constant                     | -5.73 (.58) | -9.83*                 |                    | .34              | 143.81**                      |
|         | RCADS 5 depression items - A | .51 (.06)   | 8.55*                  | 1.66               |                  |                               |
| Model 2 | Constant                     | -5.98 (.77) | -7.81*                 |                    | .41              | 6.23<br>( $p = .013$ )        |
|         | RCADS 5 depression items - A | .45 (.08)   | 5.55*                  | 1.56 [1.35-1.85]   |                  |                               |
|         | MFQ19_T                      | .45 (.18)   | 2.50<br>( $p = .012$ ) | 1.56 [1.10 - 2.23] |                  |                               |

Note. MFQ-19\_T = transformed MFQ-C item, A = adolescent-report, \* $p < .01$ .

d) Rank-ordered item-discrimination indices for the symptom impact and duration items

| Item name                                | Item                                                                                                    | Item-any anxiety/depressive disorder diagnosis correlation |                       |                    |
|------------------------------------------|---------------------------------------------------------------------------------------------------------|------------------------------------------------------------|-----------------------|--------------------|
|                                          |                                                                                                         | Total                                                      | Controlled for Gender | Controlled for age |
| Impact - Family and Friends <sup>a</sup> | How much of an impact do these difficulties have on your family and friends?                            | .53*                                                       | .51*                  | .52*               |
| Impact – Distress                        | How much do these difficulties upset or distress you?                                                   | .52*                                                       | .49*                  | .52*               |
| Impact – School                          | How much do these difficulties get in the way of your everyday life in these areas (School)             | .52*                                                       | .50*                  | .50*               |
| Impact - Outside the school              | How much do these difficulties get in the way of your everyday life in these areas (Outside the school) | .44*                                                       | .42*                  | .42*               |
| Impact – Friends                         | How much do these difficulties get in the way of your everyday life in these areas (Friends)            | .40*                                                       | .37*                  | .38*               |
| Impact -Time                             | How long have you had these difficulties for?                                                           | .34*                                                       | .31*                  | .30*               |
| Impact – Home                            | How much do these difficulties get in the way of your everyday life in these areas (Home)               | .30*                                                       | .27*                  | .30*               |

Note. <sup>a</sup>Item with a high (>10%) proportion of missing responses, \* $p < .01$ .

e) ROC curve analyses for 11 RCADS items with different combinations of symptom impact and duration items

|                                             | Total       |             | Boys           |             | Girls          |             | Older adolescents |             | Younger adolescents |             |                |
|---------------------------------------------|-------------|-------------|----------------|-------------|----------------|-------------|-------------------|-------------|---------------------|-------------|----------------|
|                                             | AUC (total) | Cut-off     | Sens/Spec      | Cut-off     | Sens/Spec      | Cut-off     | Sens/Spec         | Cut-off     | Sens/Spec           | Cut-off     | Sens/Spec      |
| RCADS 11-item Total                         | .82         | 12.5        | .80/.71        | 8.5         | .84/.70        | 14.5        | .72/.68           | 14.5        | .80/.76             | 11.5        | .78/.66        |
| RCADS 11-item Total + 5 Impact items        | .84         | 22.5        | .82/.74        | 18.0        | .88/.78        | 24.5        | .75/.70           | 24.5        | .84/.78             | 21.5        | .76/.73        |
| RCADS 11-item Total + 4 Impact items        | .85         | 19.5        | .83/.73        | 16.5        | .83/.78        | 21.5        | .77/.71           | 22.5        | .80/.79             | 18.5        | .76/.70        |
| RCADS 11-item Total + 3 Impact items        | .84         | 18.5        | .81/.73        | 14.5        | .88/.80        | 20.5        | .75/.70           | 20.5        | .84/.79             | 17.5        | .74/.71        |
| <b>RCADS 11-item Total + 2 Impact items</b> | <b>.84</b>  | <b>16.5</b> | <b>.84/.72</b> | <b>13.5</b> | <b>.88/.78</b> | <b>18.5</b> | <b>.76/.66</b>    | <b>18.6</b> | <b>.86/.74</b>      | <b>16.5</b> | <b>.74/.72</b> |
| RCADS 11-item Total + 1 Impact item         | .83         | 14.5        | .83/.71        | 10.5        | .89/.71        | 17.5        | .72/.70           | 17.5        | .79/.79             | 14.5        | .73/.73        |

Note. Sens/Spec = Sensitivity/Specificity.

f) Summary of binary logistic regression for total scale with and without symptom impact items (adolescent-report)

| Model   |                         | $b$ (SE)    | Wald $z$ -value | OR (95% CI)       | McFadden's $R^2$ | Model fit change ( $\chi^2$ ) |
|---------|-------------------------|-------------|-----------------|-------------------|------------------|-------------------------------|
| Model 1 | Constant                | -2.44 (.28) | -8.81*          |                   | .28              | 142.47*                       |
|         | RCADS 11 item Total - A | .19 (.02)   | 10.02*          | 1.21 [1.64, 1.25] |                  |                               |
| Model 2 | Constant                | -3.97 (.44) | -9.00*          |                   | .41              | 26.59*                        |

|                         |           |       |                      |
|-------------------------|-----------|-------|----------------------|
| RCADS 11 item Total - A | .11 (.03) | 4.37* | 1.12 [1.07,<br>1.18] |
| Impact items - A        | .62 (.13) | 4.90* | 1.85 [1.46,<br>2.40] |

---

*Note.* A = adolescent-report, \* $p < .01$ .

Parent-report

a) Rank-ordered item-discrimination indices for the suicidal ideation items

| Item name | Item                                                           | Item-depression diagnosis correlation |                       |                    |
|-----------|----------------------------------------------------------------|---------------------------------------|-----------------------|--------------------|
|           |                                                                | Total                                 | Controlled for Gender | Controlled for age |
| MFQ-P16_T | My child thought that life wasn't worth living                 | .33*                                  | .33*                  | .33*               |
| MFQ-P17_T | My child thought about death or dying                          | .22*                                  | .22*                  | .25*               |
| MFQ-P19_T | My child thought about killing himself/herself                 | .21*                                  | .21*                  | .22*               |
| MFQ-P18_T | My child thought my family would be better off without him/her | 0.05                                  | 0.04                  | 0.08               |

Note. MFQ-P16-19\_T = transformed MFQ-P item, \* $p < .01$ .

b) ROC curve analyses for 5 RCADS items plus different combinations of suicidal ideation items

|                                                   | Total       |             | Boys           |            | Girls          |             | Older adolescents |            | Younger adolescents |             |                |
|---------------------------------------------------|-------------|-------------|----------------|------------|----------------|-------------|-------------------|------------|---------------------|-------------|----------------|
|                                                   | AUC (total) | Cut-off     | Sens/Spec      | Cut-off    | Sens/Spec      | Cut-off     | Sens/Spec         | Cut-off    | Sens/Spec           | Cut-off     | Sens/Spec      |
| 5 Depression items                                | .86         | 6.5         | .84/.75        | 5.5        | .93/.75        | 6.5         | .85/.72           | 6.5        | .82/.74             | 6.5         | .90/.76        |
| <b>5 Depression items + MFQ-P16_T<sup>1</sup></b> | <b>.87</b>  | <b>6.75</b> | <b>.90/.77</b> | <b>6.5</b> | <b>.90/.84</b> | <b>6.75</b> | <b>.90/.74</b>    | <b>6.5</b> | <b>.86/.76</b>      | <b>7.25</b> | <b>.90/.84</b> |
| 5 Depression items + MFQ-P19_T                    | .87         | 6.75        | .92/.76        | 6.5        | .90/.84        | 7.25        | .79/.78           | 6.5        | .90/.75             | 7.25        | .90/.82        |

Note. Sens/Spec = Sensitivity/Specificity, MFQ-P16-19\_T = transformed MFQ-P item.

c) Summary of binary logistic regression for 5 RCADS depression items with and without suicidal ideation item

| Model                        | <i>b</i> (SE) | Wald z-value (p-value) | OR (95% CI)       | McFadden's $R^2$ | Model fit change ( $\chi^2$ ) |
|------------------------------|---------------|------------------------|-------------------|------------------|-------------------------------|
| Model 1                      |               |                        |                   |                  |                               |
| Constant                     | -4.41 (.43)   | -10.36*                |                   | .32              | 111.16*                       |
| RCADS 5 depression items - P | .43 (.05)     | 8.42*                  | 1.66 [1.49, 1.89] |                  |                               |
| Model 2                      |               |                        |                   |                  |                               |
| Constant                     | -4.92 (.57)   | -8.58*                 |                   | .61              | .451 (p = .502)               |
| RCADS 5 depression items - P | .45 (.07)     | 6.43*                  | 1.56 [1.38-1.81]  |                  |                               |
| MFQ-P19_T                    | .15 (.23)     | .68 (p = .497)         | 1.17 [.73-1.81]   |                  |                               |

Note. MFQ-P19\_T = transformed MFQ-P item, P = parent-report, \* $p < .01$ .

<sup>1</sup> The ROC curve analyses confirmed that the optimal parent-report depression scale with MFQ-16 risk item was not significantly different ( $p = .93$ ) from the parent-report depression scale that included the same MFQ-19 risk item as adolescent-report depression scale.

d) Rank-ordered item-discrimination indices for the 11 RCADS items plus symptom impact and duration items

| Item name                 | Item                                                                                                             | Item- anxiety diagnosis correlation |                       |                    |
|---------------------------|------------------------------------------------------------------------------------------------------------------|-------------------------------------|-----------------------|--------------------|
|                           |                                                                                                                  | Total                               | Controlled for Gender | Controlled for age |
| Impact-Distress           | How much do these difficulties upset or distress your child?                                                     | .65*                                | .63*                  | .65*               |
| Impact-Family             | How much of an impact do these difficulties have on you or the family as a whole?                                | .60*                                | .58*                  | .61*               |
| Impact-School             | How much do these difficulties get in the way of your child's everyday life in these areas? (School)             | .59*                                | .57*                  | .59*               |
| Impact-Outside the school | How much do these difficulties get in the way of your child's everyday life in these areas? (Outside the school) | .58*                                | .56*                  | .58*               |
| Impact-Home               | How much do these difficulties get in the way of your child's everyday life in these areas? (Home)               | .54*                                | .52*                  | .54*               |
| Impact-Friends            | How much do these difficulties get in the way of your child's everyday life in these areas? (Friends)            | .49*                                | .46*                  | .49*               |
| Impact-Time               | How long has your child had these difficulties for?                                                              | .23*                                | .21*                  | .24*               |

Note. \* $p < .01$ .

e) ROC curve analyses for different combinations of symptom impact and duration items

|                                                       | Total Boys  |             |                | Girls       |                | Older adolescents |                |             | Younger adolescents |             |                |
|-------------------------------------------------------|-------------|-------------|----------------|-------------|----------------|-------------------|----------------|-------------|---------------------|-------------|----------------|
|                                                       | AUC (total) | Cut-off     | Sens/Spec      | Cut-off     | Sens/Spec      | Cut-off           | Sens/Spec      | Cut-off     | Sens/Spec           | Cut-off     | Sens/Spec      |
| RCADS 11-itemTotal                                    | .88         | 10.5        | .80/.79        | 7.5         | .96/.80        | 11.5              | .78/.75        | 9.5         | .84/.77             | 10.5        | .80/.77        |
| RCADS 11-itemTotal – matched to adolescent-report     | .89         | 14.5        | .82/.80        | 12.5        | .86/.84        | 14.5              | .87/.74        | 14.5        | .84/.83             | 14.5        | .80/.79        |
| RCADS 11-itemTotal + 6 Impact items                   | .90         | 20.5        | .84/.79        | 17.5        | .82/.82        | 22.5              | .83/.78        | 20.5        | .84/.80             | 20.5        | .85/.79        |
| RCADS 11-itemTotal + 5 Impact items                   | .90         | 19.5        | .82/.80        | 15.5        | .89/.84        | 21.5              | .81/.80        | 18.5        | .87/.80             | 19.6        | .81/.79        |
| RCADS 11-itemTotal + 4 Impact items                   | .90         | 18.5        | .81/.81        | 14.5        | .86/.84        | 19.5              | .83/.77        | 17.5        | .87/.80             | 18.5        | .80/.80        |
| RCADS 11-itemTotal + 3 Impact item                    | .90         | 16.5        | .81/.80        | 13.5        | .86/.84        | 17.5              | .84/.76        | 15.5        | .86/.80             | 16.5        | .80/.79        |
| RCADS 11-itemTotal + 2 Impact item                    | .90         | 14.5        | .82/.80        | 11.5        | .92/.82        | 15.5              | .81/.76        | 13.5        | .86/.80             | 14.5        | .82/.79        |
| <b>RCADS 11-itemTotal + 1 Impact item<sup>2</sup></b> | <b>.89</b>  | <b>12.5</b> | <b>.83/.80</b> | <b>10.5</b> | <b>.84/.84</b> | <b>13.5</b>       | <b>.83/.75</b> | <b>12.5</b> | <b>.84/.83</b>      | <b>12.5</b> | <b>.81/.79</b> |

Note. Sens/Spec = Sensitivity/Specificity.

<sup>2</sup> The ROC curve analyses confirmed that the optimal parent-report total scale with one symptom impact item was not significantly different ( $p = .62$ ) from the parent-report total scale that included the same symptom impact items as adolescent-report total scale.

f) Summary of binary logistic regression for the 11 RCADS items with and without symptom impact items

| Model   |                         | <i>b</i> ( <i>SE</i> ) | Wald <i>z</i> -<br>value<br>( <i>p</i> -value) | OR (95% CI)       | McFadden's<br><i>R</i> <sup>2</sup> | Model fit<br>change ( $\chi^2$ ) |
|---------|-------------------------|------------------------|------------------------------------------------|-------------------|-------------------------------------|----------------------------------|
| Model 1 |                         |                        |                                                |                   |                                     |                                  |
|         | Constant                | -2.74 (.28)            | -9.94*                                         | 1.29 [1.24, 1.35] | .42                                 | 213.67*                          |
|         | RCADS 11 item Total - P | .26 (.02)              | 11.02*                                         |                   |                                     |                                  |
| Model 2 |                         |                        |                                                |                   |                                     |                                  |
|         | Constant                | -3.79 (.40)            | -9.42*                                         |                   | .50                                 | 17.06*                           |
|         | RCADS 11 item Total - P | .15 (.03)              | 4.52*                                          | 1.16 [1.09, 1.24] |                                     |                                  |
|         | Impact items - P        | .53 (.13)              | 4.02*                                          | 1.69 [1.31, 2.20] |                                     |                                  |

Note. P = parent-report, \**p* < .01.
