# Supplementary material for: Using the 11-item Version of the RCADS to Identify Anxiety and Depressive Disorders in Adolescents
Source: Springer Nature journal article supplement (doi:10.1007/s10802-021-00817-w), 2021-04-01
Supplement: MOESM4 [file 19031724]

**Using the 11-item Version of the RCADS to Identify Anxiety and Depressive Disorders in  
Adolescents**

*Journal of Abnormal Child Psychology*

Electronic Supplementary Material 4: McDonald's omega coefficients with 95% confidence intervals for 11 RCADS items/original RCADS and RCADS-25 anxiety/depression subscales and total scales – adolescent-report and parent-report.

|                                  | Community Sample | Clinic-referred sample |                   |                      |
|----------------------------------|------------------|------------------------|-------------------|----------------------|
|                                  |                  | Total sample           | Anxiety subsample | Depression subsample |
| RCADS 6 anxiety items - A        | .89 [.87-.91]    | .72 [.67-.78]          | .73 [.67-.78]     | .70 [.59-.80]        |
| RCADS-Anxiety subscale - A       | .97 [.96-.98]    | .94 [.93-.95]          | .94 [.93-.95]     | .93 [.90-.95]        |
| RCADS-25-Anxiety subscale - A    | .92 [.90-.93]    | .86 [.83-.88]          | .85 [.82-.88]     | .81 [.75-.88]        |
| RCADS 5 depression items - A     | .87 [.85-.90]    | .88 [.85-.90]          | .88 [.85-.90]     | .72 [.62-.82]        |
| RCADS-Depression subscale - A    | .92 [.91-.94]    | .90 [.99-.92]          | .90 [.87-.92]     | .82 [.76-.88]        |
| RCADS-25-Depression subscale - A | .92 [.91-.94]    | .90 [.99-.92]          | .90 [.87-.92]     | .82 [.76-.88]        |
| RCADS 11 total items - A         | .92 [.90-.93]    | .83 [.80-.86]          | .80 [.80-.87]     | .74 [.65-.83]        |
| RCADS-Total scale - A            | .97 [.97-.98]    | .95 [.94-.96]          | .95 [.94-.96]     | .92 [.89-.95]        |
| RCADS-25-Total scale - A         | .95 [.94-.96]    | .89 [.87-.91]          | .90 [.87-.92]     | .84 [.78-.89]        |
| RCADS 6 anxiety items - P        | .90 [.88-.92]    | .77 [.73-.82]          | .77 [.72-.82]     | .78 [.69-.86]        |
| RCADS-Anxiety – subscale - P     | .98 [.97-.98]    | .94 [.92-.95]          | .93 [.92-.95]     | .93 [.90-.95]        |
| RCADS-25-Anxiety subscale - P    | .94 [.92-.95]    | .85 [.81-.88]          | .84 [.80-.87]     | .82 [.75-.89]        |
| RCADS 5 depression items - P     | .90 [.88-.92]    | .85 [.82-.88]          | .85 [.82-.89]     | .72 [.62-.82]        |
| RCADS-Depression subscale - P    | .94 [.93-.95]    | .86 [.83-.89]          | .86 [.83-.89]     | .76 [.67-.84]        |
| RCADS-25-Depression subscale - P | .94 [.93-.95]    | .86 [.83-.89]          | .86 [.83-.89]     | .76 [.67-.84]        |
| RCADS 11 total items - P         | .94 [.92-.95]    | .83 [.79-.86]          | .84 [.80-.87]     | .77 [.70-.85]        |
| RCADS-Total scale- P             | .97 [.96-.98]    | .93 [.92-.94]          | .93 [.92-.94]     | .94 [.93-.95]        |
| RCADS-25-Total scale - P         | .97 [.96-.97]    | .89 [.86-.91]          | .89 [.87-.91]     | .82 [.76-.89]        |

Note. A = adolescent-report, P = parent-report.
