# Supplementary material for: Using the 11-item Version of the RCADS to Identify Anxiety and Depressive Disorders in Adolescents
Source: Springer Nature journal article supplement (doi:10.1007/s10802-021-00817-w), 2021-04-01
Supplement: MOESM5 [file 19031724]

**Using the 11-item Version of the RCADS to Identify Anxiety and Depressive Disorders in  
Adolescents**

*Journal of Abnormal Child Psychology*

Electronic Supplementary Material 5: Convergent and divergent validity coefficients for RCADS 11 items/original RCADS-47/RCADS-25.

|                                  | MFQ-C/P<br>Community Sample | MFQ-C/P - Clinic-referred Sample |                      |                         |
|----------------------------------|-----------------------------|----------------------------------|----------------------|-------------------------|
|                                  |                             | Total sample                     | Anxiety<br>subsample | Depression<br>subsample |
| RCADS 6 anxiety items - A        | .77*                        | .58*                             | .60*                 | .28 ( $p = .083$ )      |
| RCADS-Anxiety subscale - A       | .77*                        | .59*                             | .63*                 | .25 ( $p = .111$ )      |
| RCADS-25-Anxiety subscale - A    | .76*                        | .55*                             | .59*                 | .20 ( $p = .189$ )      |
| RCADS 5 depression items - A     | .80*                        | .77*                             | .77*                 | .63*                    |
| RCADS-Depression subscale- A     | .85*                        | .80*                             | .80*                 | .53*                    |
| RCADS-25-Depression subscale - A | .85*                        | .80*                             | .80*                 | .53*                    |
| RCADS 6 anxiety items - P        | .76*                        | .50*                             | .53*                 | .44 ( $p = .011$ )      |
| RCADS-Anxiety subscale - P       | .77*                        | .49*                             | .52*                 | .50*                    |
| RCADS-25-Anxiety subscale - P    | .76*                        | .48*                             | .50*                 | .46*                    |
| RCADS 5 depression items - P     | .79*                        | .70*                             | .71*                 | .71*                    |
| RCADS-Depression subscale - P    | .85*                        | .71*                             | .72*                 | .67*                    |
| RCADS-25-Depression subscale - P | .85*                        | .71*                             | .72*                 | .67*                    |

*Note.* A = adolescent-report, P = parent-report, \* $p < .01$ .
