# Supplementary material for: Using the 11-item Version of the RCADS to Identify Anxiety and Depressive Disorders in Adolescents
Source: Springer Nature journal article supplement (doi:10.1007/s10802-021-00817-w), 2021-04-01
Supplement: MOESM6 [file 19031724]

**Using the 11-item Version of the RCADS to Identify Anxiety and Depressive Disorders in  
Adolescents**

*Journal of Abnormal Child Psychology*

Electronic Supplementary Material 6: ROC curve analyses for the 11-item RCADS-P (current study), the original RCADS-P, and the RCADS-25-P.

| Number of items                  | RCADS: Anxiety |                 |                 | RCADS: Depression |                 |                 | RCADS: Total    |                 |                 |
|----------------------------------|----------------|-----------------|-----------------|-------------------|-----------------|-----------------|-----------------|-----------------|-----------------|
|                                  | 6 <sup>a</sup> | 37 <sup>b</sup> | 15 <sup>c</sup> | 5 <sup>a</sup>    | 10 <sup>b</sup> | 10 <sup>c</sup> | 11 <sup>a</sup> | 47 <sup>b</sup> | 25 <sup>c</sup> |
| <b>Total</b>                     |                |                 |                 |                   |                 |                 |                 |                 |                 |
| AUC                              | .86            | .83             | .82             | .86               | .84             | .84             | .88             | .86             | .86             |
| Cut-off                          | 5.5            | 34.4            | 10.4            | 6.5               | 11.625          | 11.625          | 10.5            | 41.4            | 19.3            |
| Sensitivity/<br>Specificity      | .80/.77        | .73/.73         | .74/.73         | .84/.75           | .81/.74         | .81/.74         | .80/.79         | .78/.75         | .77/.77         |
| <i>n</i> (positive;<br>negative) | 197;227        | 210;227         | 211;225         | 76;364            | 77;373          | 77;373          | 206;214         | 223;214         | 232;214         |
| <b>Boys</b>                      |                |                 |                 |                   |                 |                 |                 |                 |                 |
| AUC                              | .90            | .87             | .84             | .88               | .85             | .85             | .91             | .88             | .88             |
| Cut-off                          | 4.5            | 27.5            | 7.8             | 5.5               | 9.5             | 9.5             | 7.5             | 34.7            | 12.50           |
| Sensitivity/<br>Specificity      | .84/.83        | .81/.77         | .76/.75         | .93/.75           | .86/.72         | .86/.72         | .96/.80         | .82/.80         | .92/.78         |
| <i>n</i> (positive;<br>negative) | 44;93          | 48;93           | 46;93           | 14;129            | 14;130          | 14;130          | 45;91           | 50;91           | 50;91           |
| <b>Girls</b>                     |                |                 |                 |                   |                 |                 |                 |                 |                 |
| AUC                              | .83            | .81             | .8              | .84               | .84             | .84             | .86             | .83             | .84             |
| Cut-off                          | 6.5            | 37.5            | 11.9            | 6.5               | 12.25           | 12.25           | 11.5            | 45.5            | 21.5            |
| Sensitivity/<br>Specificity      | .75/.75        | .75/.72         | .74/.70         | .85/.72           | .79/.73         | .79/.73         | .78/.75         | .76/.72         | .75/.72         |
| <i>n</i> (positive;<br>negative) | 153;134        | 162;134         | 165;132         | 62;235            | 63;243          | 63;243          | 179;117         | 173;123         | 182;123         |
| <b>Older adolescents</b>         |                |                 |                 |                   |                 |                 |                 |                 |                 |
| AUC                              | .87            | .84             | .82             | .84               | .83             | .83             | .90             | .86             | .87             |
| Cut-off                          | 4.5            | 32.9            | 9.5             | 6.5               | 11.625          | 11.625          | 9.5             | 35.4            | 17.5            |
| Sensitivity/<br>Specificity      | .87/.71        | .70/.70         | .73/.70         | .82/.74           | .80/.73         | .80/.73         | .84/.77         | .87/.71         | .83/.73         |
| <i>n</i> (positive;<br>negative) | 98;77          | 105;77          | 106;76          | 56;129            | 56;131          | 56;131          | 109;66          | 116;66          | 120;66          |
| <b>Younger adolescents</b>       |                |                 |                 |                   |                 |                 |                 |                 |                 |
| AUC                              | .85            | .84             | .83             | .89               | .88             | .88             | .88             | .86             | .87             |
| Cut-off                          | 5.5            | 35.5            | 10.9            | 6.5               | 12.25           | 12.25           | 10.5            | 39.5            | 19.4            |
| Sensitivity/<br>Specificity      | .82/.77        | .76/.76         | .77/.74         | .90/.76           | .81/.76         | .81/.76         | .80/.77         | .82/.73         | .78/.78         |
| <i>n</i> (positive;<br>negative) | 99;150         | 105;150         | 105;149         | 20;235            | 21;242          | 21;242          | 97;148          | 107;148         | 112;148         |

Note. <sup>a</sup>11-item RCADS-P, <sup>b</sup>RCADS-P, <sup>c</sup>RCADS-25-P.
