# Supplementary material for: Using the 11-item Version of the RCADS to Identify Anxiety and Depressive Disorders in Adolescents
Source: Springer Nature journal article supplement (doi:10.1007/s10802-021-00817-w), 2021-04-01
Supplement: MOESM7 [file 19031724]

**Using the 11-item Version of the RCADS to Identify Anxiety and Depressive Disorders in  
Adolescents**

*Journal of Abnormal Child Psychology*

Electronic Supplementary Material 7: Anxiety and depression screening items with instructions

**Brief 11-item version of the RCADS for Adolescents  
(adolescent-report)**

Please put a circle around the word that shows how often each of these things happens to you. There are no right or wrong answers.

|                                                                                    |       |           |       |        |
|------------------------------------------------------------------------------------|-------|-----------|-------|--------|
| 1. I have trouble going to school in the mornings because I feel nervous or afraid | Never | Sometimes | Often | Always |
| 2. I have no energy for things                                                     | Never | Sometimes | Often | Always |
| 3. I worry when I go to bed at night                                               | Never | Sometimes | Often | Always |
| 4. I worry about what is going to happen                                           | Never | Sometimes | Often | Always |
| 5. Nothing is much fun anymore                                                     | Never | Sometimes | Often | Always |
| 6. All of a sudden I feel really scared for no reason at all                       | Never | Sometimes | Often | Always |
| 7. I feel worthless                                                                | Never | Sometimes | Often | Always |
| 8. I feel sad or empty                                                             | Never | Sometimes | Often | Always |
| 9. When I have a problem, my heart beats really fast                               | Never | Sometimes | Often | Always |
| 10. I am tired a lot                                                               | Never | Sometimes | Often | Always |
| 11. I worry I might look foolish                                                   | Never | Sometimes | Often | Always |

Impact supplement (optional):

Now please answer the following questions about those things that you said happen to you 'sometimes' 'often' or 'always'.

|                                                                                |            |               |             |              |
|--------------------------------------------------------------------------------|------------|---------------|-------------|--------------|
| How much do these difficulties upset or distress you?                          | Not at all | Only a little | Quite a lot | A great deal |
| How much do these difficulties get in the way of your everyday life in school? | Not at all | Only a little | Quite a lot | A great deal |

**Scoring:**

|                                                                                                         |
|---------------------------------------------------------------------------------------------------------|
| Never/not at all = 0<br>Sometimes/only a little = 1<br>Often/quite a lot = 2<br>Always/a great deal = 3 |
|---------------------------------------------------------------------------------------------------------|

Anxiety scale (summarise items 1, 3, 4, 6, 9, 11): \_\_\_\_\_

Depression scale (summarise items 2, 5, 7, 8, 10): \_\_\_\_\_

Total scale (summarise all items): \_\_\_\_\_

Total scale + impact (total scale + impact items): \_\_\_\_\_

**Interpretation/cut-off scores:**

|                  |                   | Boys      | Girls     |
|------------------|-------------------|-----------|-----------|
| Anxiety Scale    | Symptoms          | $\geq 5$  | $\geq 9$  |
| Depression Scale | Symptoms          | $\geq 8$  | $\geq 9$  |
| Total Scale      | Symptoms          | $\geq 9$  | $\geq 14$ |
|                  | Symptoms + Impact | $\geq 14$ | $\geq 18$ |

**Brief 11-item version of the RCADS for Adolescents  
(parent-report)**

Please put a circle around the word that shows how often each of these things happens for your child.

|                                                                                              |       |           |       |        |
|----------------------------------------------------------------------------------------------|-------|-----------|-------|--------|
| 1. My child has trouble going to school in the mornings because of feeling nervous or afraid | Never | Sometimes | Often | Always |
| 2. My child has no energy for things                                                         | Never | Sometimes | Often | Always |
| 3. My child worries when in bed at night                                                     | Never | Sometimes | Often | Always |
| 4. My child worries about what is going to happen                                            | Never | Sometimes | Often | Always |
| 5. Nothing is much fun for my child anymore                                                  | Never | Sometimes | Often | Always |
| 6. All of a sudden my child will feel really scared for no reason at all                     | Never | Sometimes | Often | Always |
| 7. My child feels worthless                                                                  | Never | Sometimes | Often | Always |
| 8. My child feels sad or empty                                                               | Never | Sometimes | Often | Always |
| 9. When my child has a problem, his/her heart beats really fast                              | Never | Sometimes | Often | Always |
| 10. My child is tired a lot                                                                  | Never | Sometimes | Often | Always |
| 11. My child worries about looking foolish                                                   | Never | Sometimes | Often | Always |

Impact supplement (optional):

Now please answer the following questions about those things that you said happen to your child 'sometimes' 'often' or 'always'.

|                                                                                        |            |               |             |              |
|----------------------------------------------------------------------------------------|------------|---------------|-------------|--------------|
| How much do these difficulties upset or distress your child?                           | Not at all | Only a little | Quite a lot | A great deal |
| How much do these difficulties get in the way of your child's everyday life in school? | Not at all | Only a little | Quite a lot | A great deal |

**Scoring:**

|                                                                                                         |
|---------------------------------------------------------------------------------------------------------|
| Never/not at all = 0<br>Sometimes/only a little = 1<br>Often/quite a lot = 2<br>Always/a great deal = 3 |
|---------------------------------------------------------------------------------------------------------|

Anxiety scale (summarise items 1, 3, 4, 6, 9, 11): \_\_\_\_\_

Depression scale (summarise items 2, 5, 7, 8, 10): \_\_\_\_\_

Total scale (summarise all items): \_\_\_\_\_

Total scale + impact (total scale + impact items): \_\_\_\_\_

**Interpretation/cut-off scores:**

|                  |                   | Boys      | Girls     |
|------------------|-------------------|-----------|-----------|
| Anxiety Scale    | Symptoms          | $\geq 5$  | $\geq 7$  |
| Depression Scale | Symptoms          | $\geq 6$  | $\geq 7$  |
| Total Scale      | Symptoms          | $\geq 8$  | $\geq 11$ |
|                  | Symptoms + Impact | $\geq 13$ | $\geq 15$ |
